# Supplementary material for: A comprehensive physical interaction map between the Turnip mosaic potyvirus and Arabidopsis thaliana proteomes
Source: Research Square preprint supplement (doi:10.21203/rs.3.rs-149993/v1), 2021-01-22
Supplement: Supplementary file 8 [file 4582db322275ad6dcf11f130.xlsx]

## Sheet: Potyvirus-Arabidopsis_liter.
Viral protein	Virus	Host protein	Host	Ath protein	Captured?	Method	Publication doi
P1	SMV	PETC	P. ternata	AT4G03280	No	Y2H	https://doi.org/10.1016/j.coviro.2012.09.004
P1b	CVYV	HYD1	A. thaliana	AT1G20050	No	Y2H	https://doi.org/10.1111/pce.13610
HCPro	TEV, TuMV, CIYVV	rgs-CaM	Tobacco	AT3G01830	No	Y2H	https://doi.org/10.1016/j.coviro.2012.09.004
HCPro	TEV	RAV2	Tobacco	AT1G68840	No	Y2H	https://doi.org/10.1016/j.coviro.2012.09.004
HCPro	PRSV	CRT1B	Papaya	AT1G09210	No	BiFC	https://doi.org/10.1016/j.coviro.2012.09.004
HCPro	PRSV	CRT1A	Papaya	AT1G56340	No	BiFC	https://doi.org/10.1016/j.coviro.2012.09.004
HCPro	PRSV	CRT3	Papaya	AT1G08450	No	BiFC	https://doi.org/10.1016/j.coviro.2012.09.004
HCPro	PVA	HIP1	Potato	AT4G22670	No	Y2H	https://doi.org/10.1016/j.coviro.2012.09.004
HCPro	PVA	HIP2	Potato	AT3G17880	No	Y2H	https://doi.org/10.1016/j.coviro.2012.09.004
HCPro	PVY	ARC11, MinD	Tobacco	AT5G24020	No	BiFC	https://doi.org/10.1016/j.coviro.2012.09.004
HCPro	PVY, LMV, PRSV	PAE1	A. thaliana, lettuce, papaya	AT1G53850	No	Y2H	https://doi.org/10.1016/j.coviro.2012.09.004
HCPro	PRSV	PAA1	C. papaya	AT4G33520	No	Y2H	https://doi.org/10.1371/journal.pone.0052546
HCPro	PVY, LMV, PRSV	PAA2	A. thaliana, lettuce, papaya	AT2G05840	No	Y2H	https://doi.org/10.1016/j.coviro.2012.09.004
HCPro	PVY, LMV, PRSV	PBB2	A. thaliana, lettuce, papaya	AT5G40580	No	Y2H	https://doi.org/10.1016/j.coviro.2012.09.004
HCPro	PVY, LMV, PRSV	PBE1	A. thaliana, lettuce, papaya	AT1G13060	No	Y2H	https://doi.org/10.1016/j.coviro.2012.09.004
HCPro	PVY, LMV, PRSV	PAE2	A. thaliana, lettuce, papaya	AT3G14290	No	Y2H, BiFC	https://doi.org/10.1016/bs.aivir.2014.11.006
HCPro	PVA, PVY, TEV	EIF4E1, CUM1	Tobacco, potato	AT4G18040	No	Y2H	https://doi.org/10.1016/j.coviro.2012.09.004
HCPro	PVA, PVY, TEV	﻿eIF(iso)4E, LSP1	Tobacco, potato	AT5G35620	No	Y2H	https://doi.org/10.1016/j.coviro.2012.09.004
HCPro	SCMV	FDV, FD5	Zea mays	AT1G60950	No	Y2H, BiFC	https://doi.org/10.1016/bs.aivir.2014.11.006
HcPro	ZYMV (ZHC)	CA1	C. quinoa	AT3G01500	No	Y2H, BiFC	https://doi.org/10.1094/MPMI-06-17-0128-FI
HCPro	ZYMV	HEN1	A. thaliana	AT4G20910	No	ELISA	https://doi.org/10.1099/vir.0.031534-0
HCPro	PVY	StubGAL83, AKINBETA1	Potato	AT5G21170	No	Y2H	https://doi.org/10.1016/j.sajb.2017.09.015
HCPro	SCMV	ZmVDE, NPQ1, AVDE1	Zea mays, N. benthamiana	AT1G08550	No	Y2H	https://doi.org/10.1104/pp.17.00638
HCPro	TuMV	NbXRN4	N. benthamiana	AT1G54490	No	Y2H, BiFC	https://doi.org/10.1371/journal.ppat.1007228
P3NPIPO	TuMV	PCAP1, PCAP1	A. thaliana	AT4G20260	No	Y2H	https://doi.org/10.1016/j.coviro.2012.09.004
P3NPIPO	SYSV, TuMV	RBCL	Onion	ATCG00490	No	Y2H	https://doi.org/10.1016/bs.aivir.2014.11.006
P3NPIPO	SYSV, TuMV	RBCS1A	Onion	AT1G67090	No	Y2H	https://doi.org/10.1016/bs.aivir.2014.11.006
P3NPIPO	SYSV, TuMV	RBCS3B	Onion	AT5G38410	No	Y2H	https://doi.org/10.1016/bs.aivir.2014.11.006
P3NPIPO	SMV	BCAT-2	Glycine max (soybean)	ATG10070	No	Y2H	https://doi.org/10.1007/s11738-016-2126-6
P3NPIPO	SMV	PRB1	Glycine max (soybean)	AT2G14580	No	Y2H	https://doi.org/10.1007/s11738-016-2126-6
P3NPIPO	SMV	AAP6	Glycine max (soybean)	AT5G49630	No	Y2H	https://doi.org/10.1007/s11738-016-2126-6
P3NPIPO	SMV	SIP1-2	Glycine max (soybean)	AT5G18290	No	Y2H	https://doi.org/10.1007/s11738-016-2126-6
P3NPIPO	SMV	HCF164	Glycine max (soybean)	AT4G37200	No	Y2H	https://doi.org/10.1007/s11738-016-2126-6
P3NPIPO	SMV	PSBR	Glycine max (soybean)	AT1G79040	No	Y2H	https://doi.org/10.1007/s11738-016-2126-6
P3NPIPO	SMV	MRS2-3	Glycine max (soybean)	AT3G19640	No	Y2H	https://doi.org/10.1007/s11738-016-2126-6
P3NPIPO	SMV	GL153	Glycine max (soybean)	AT4G16260	No	Y2H	https://doi.org/10.1007/s11738-016-2126-6
P3NPIPO	SMV	PSAD-1	Glycine max (soybean)	AT4G02770	No	Y2H	https://doi.org/10.1007/s11738-016-2126-6
P3NPIPO	SMV	PSAD-2	Glycine max (soybean)	AT1G03130	No	Y2H	https://doi.org/10.1007/s11738-016-2126-6
P3NPIPO	SMV	SEP2	Glycine max (soybean)	AT2G21970	No	Y2H	https://doi.org/10.1007/s11738-016-2126-6
P3NPIPO	SMV	NUDX26	Glycine max (soybean)	AT3G10620	No	Y2H	https://doi.org/10.1007/s11738-016-2126-6
P3NPIPO	SMV	GOS12	Glycine max (soybean)	AT2G45200	No	Y2H	https://doi.org/10.1007/s11738-016-2126-6
P3NPIPO	SMV	PDV1	Glycine max (soybean)	AT5G53280	No	Y2H	https://doi.org/10.1007/s11738-016-2126-6
P3NPIPO	SMV	VAMP722, SAR1	Glycine max (soybean)	AT2G33120	No	Y2H	https://doi.org/10.1007/s11738-016-2126-6
P3NPIPO	SMV	RCA	Glycine max (soybean)	AT2G39730	No	Y2H	https://doi.org/10.1007/s11738-016-2126-6
P3NPIPO	SMV	TCTP-1	Glycine max (soybean)	AT3G16640	No	Y2H	https://doi.org/10.1007/s11738-016-2126-6
P3NPIPO	SMV	TCTP-2	Glycine max (soybean)	AT3G05540	No	Y2H	https://doi.org/10.1007/s11738-016-2126-6
P3NPIPO	SMV	ACA12	Glycine max (soybean)	AT3G63380	No	Y2H	https://doi.org/10.1007/s11738-016-2126-6
P3NPIPO	SMV	TRXH2	Glycine max (soybean)	AT5G39950	No	Y2H	https://doi.org/10.1007/s11738-016-2126-6
P3NPIPO	SMV	GDMT, HPT	Glycine max (soybean)	AT2G18950	No	Y2H	https://doi.org/10.1007/s11738-016-2126-6
P3NPIPO	SMV	CYSB	Glycine max (soybean)	AT3G12490	No	Y2H	https://doi.org/10.1007/s11738-016-2126-6
P3NPIPO	SMV	CP12	Glycine max (soybean)	AT3G62410	No	Y2H	https://doi.org/10.1007/s11738-016-2126-6
P3NPIPO	SMV	CLPC1	Glycine max (soybean)	AT5G50920	No	Y2H	https://doi.org/10.1007/s11738-016-2126-6
P3NPIPO	SMV	ROC3	Glycine max (soybean)	AT2G16600	No	Y2H	https://doi.org/10.1007/s11738-016-2126-6
P3NPIPO	SMV	AURP	Glycine max (soybean)	AT1G28330	No	Y2H	https://doi.org/10.1007/s11738-016-2126-6
P3NPIPO	SMV	ARP1	Glycine max (soybean)	AT5G24510	No	Y2H	https://doi.org/10.1007/s11738-016-2126-6
P3NPIPO	SMV	CBL	Glycine max (soybean)	AT4G17615	No	Y2H	https://doi.org/10.1007/s11738-016-2126-6
P3NPIPO	SMV	aarF	Glycine max (soybean)	AT1G79600	No	Y2H	https://doi.org/10.1007/s11738-016-2126-6
P3NPIPO	SMV	RPL23A	Glycine max (soybean)	AT2G39460	No	Y2H	https://doi.org/10.1007/s11738-016-2126-6
P3NPIPO	SMV	MMIF	Glycine max (soybean)	AT3G51660	No	Y2H	https://doi.org/10.1007/s11738-016-2126-6
P3NPIPO	SMV	SRP, LDAP3, SRP3	Glycine max (soybean)	AT3g05500	No	Y2H	https://doi.org/10.1007/s11738-016-2126-6
P3NPIPO	SMV	MLS	Glycine max (soybean)	AT5G03860	No	Y2H	https://doi.org/10.1007/s11738-016-2126-6
P3NPIPO	SMV	MLP34	Glycine max (soybean)	AT1G70850	No	Y2H	https://doi.org/10.1007/s11738-016-2126-6
P3NPIPO	SMV	HAT22	Glycine max (soybean)	AT4G37790	No	Y2H	https://doi.org/10.1007/s11738-016-2126-6
P3NPIPO	SMV	CPB, CATHB1	Glycine max (soybean)	AT1G02300	No	Y2H	https://doi.org/10.1007/s11738-016-2126-6
P3NPIPO	SMV	GLYSOJA, OXS3	Glycine max (soybean)	AT5G56550	No	Y2H	https://doi.org/10.1007/s11738-016-2126-6
P3NPIPO	SMV	CSB2	Glycine max (soybean)	AT3G15980, AT1G52360	No	Y2H	https://doi.org/10.1007/s11738-016-2126-6
P3NPIPO	SMV	AGT2	Glycine max (soybean)	AT4G39660	No	Y2H	https://doi.org/10.1007/s11738-016-2126-6
P3NPIPO	SMV	WRKY51	Glycine max (soybean)	AT5G64810	No	Y2H	https://doi.org/10.1007/s11738-016-2126-6
P3NPIPO	SMV	ICL	Glycine max (soybean)	AT3G21720	No	Y2H	https://doi.org/10.1007/s11738-016-2126-6
P3NPIPO	SMV	TTG1	Glycine max (soybean)	AT5G24520	No	Y2H	https://doi.org/10.1007/s11738-016-2126-6
P3NPIPO	SMV	UP1	Glycine max (soybean)	AT1G36980	No	Y2H	https://doi.org/10.1007/s11738-016-2126-6
P3NPIPO	SMV	UP2	Glycine max (soybean)	AT2G23090	No	Y2H	https://doi.org/10.1007/s11738-016-2126-6
P3	SYSV, OYDV, SMV, TuMV	RBCL	Onion	ATCG00490	No	Y2H	https://doi.org/10.1016/j.coviro.2012.09.004
P3	SYSV, OYDV, SMV, TuMV	RBCS1A	Onion	AT1G67090	No	Y2H	https://doi.org/10.1016/j.coviro.2012.09.004
P3	SYSV, OYDV, SMV, TuMV	RBCS3B	Onion	AT5G38410	No	Y2H	https://doi.org/10.1016/j.coviro.2012.09.004
P3	SYSV, TuMV	DEG24, RBCS2B	Onion	AT5G38420	No	Y2H	https://doi.org/10.1016/j.coviro.2012.09.004
P3	SYSV, TuMV	RBCS1B	Onion	AT5G38430	No	Y2H	https://doi.org/10.1016/j.coviro.2012.09.004
P3	SMV	eEF1A	Glycine max (soybean), N. benthamiana	AT3G58470	No	Y2H, BiFC, ELISA	https://doi.org/10.1104/pp.16.00505
P3	SMV	ADF2	Glycine max (soybean)	AT3G46000	No	Y2H	https://doi.org/10.1007/s11262-014-1150-0
P3	SMV	RHP	Glycine max (soybean)	n/a	n/a	BiFC	https://doi.org/10.1016/j.bbrc.2017.12.043
P3	SMV	CYTB5	Glycine max (soybean)	AT2G32720	No	Y2H, BiFC	https://doi.org/10.3390/v11060546
CI	TEV	P58IPK	N. benthamiana	AT5G03160	No	Y3H, Y2H	https://doi.org/10.1016/j.coviro.2012.09.004
CI	PPV, TVMV	PSAK	N. benthamiana	AT1G30380	No	Y2H	https://doi.org/10.1016/j.coviro.2012.09.004
CI	LMV	﻿eIF4E	Lettuce	AT4G18040	No	BiFC	https://doi.org/10.1016/bs.aivir.2014.11.006
CI	LMV	eIF4E	Lettuce	AT4G18040	No	ELISA, BiFC	https://doi.org/10.1016/j.coviro.2012.09.004
CI	TuMV	ADL6, DRP2A	Glycine max (soybean)	AT1G10290	No	BiFC	https://doi.org/10.1128/JVI.01320-18
CI	TuMV	ADL3, DRP2B	Glycine max (soybean)	AT1G59610	No	BiFC	https://doi.org/10.1128/JVI.01320-18
6K2	TuMV	Sec24a	A. thaliana	AT3G07110	No	Y2H	https://doi.org/10.1128/JVI.00503-15
6K2	TuMV	ADL6, DRP2A	Glycine max (soybean)	AT1G10290	No	BiFC	https://doi.org/10.1128/JVI.01320-18
6K2	TuMV	ADL3, DRP2B	Glycine max (soybean)	AT1G59610	No	BiFC	https://doi.org/10.1128/JVI.01320-18
NIaPro	TuMV	PAB2	A. thaliana	AT4G34110	No	Y2H	https://doi.org/10.1016/j.coviro.2012.09.004
NIaPro	TuMV	PAB4	A. thaliana	AT2G23350	No	Y2H	https://doi.org/10.1016/j.coviro.2012.09.004
NIaPro	TuMV	PAB8	A. thaliana	AT1G49760	No	Y2H	https://doi.org/10.1016/j.coviro.2012.09.004
NIaPro	PRSV	MsrB1	Papaya	AT1G53670	No	Y2H	https://doi.org/10.1016/bs.aivir.2014.11.006
NIaPro	PRSV	eIF3G	Papaya	AT3G11400	No	BiFC	https://doi.org/10.1007/s11262-014-1145-x
VPg	TuMV	PAB2	A. thaliana	AT4G34110	No	Y2H	https://doi.org/10.1016/j.coviro.2012.09.004
VPg	TuMV	PAB4	A. thaliana	AT2G23350	No	Y2H	https://doi.org/10.1016/j.coviro.2012.09.004
VPg	TuMV	PAB8	A. thaliana	AT1G49760	No	Y2H	https://doi.org/10.1016/j.coviro.2012.09.004
VPg	TEV, TuMV, PVY	EIF4E1, CUM1	A. thaliana, N. benthamiana, N. tabacum, C. annuum	AT4G18040	No	Y2H, ELISA	https://doi.org/10.1016/j.coviro.2012.09.004
VPg	TuMV, TEV	﻿EIF(iso)4E, LSP1	A. thaliana, B. perviridis	AT5G35620	Yes	Y2H	https://doi.org/10.1016/j.coviro.2012.09.004
VPg	TuMV, TEV	﻿EIF4G, CUM2	A. thaliana, N. tabacum	AT3G60240	No	Y2H	https://doi.org/10.1016/j.coviro.2012.09.004
VPg	TuMV, TEV	EIFISO4G1	A. thaliana, N. tabacum	AT5G57870	No	Y2H	https://doi.org/10.1016/j.coviro.2012.09.004
VPg	TuMV, TEV	EIFISO4G2	A. thaliana, N. tabacum	AT2G24050	No	Y2H	https://doi.org/10.1016/j.coviro.2012.09.004
VPg	TuMV	OBE1	N. benthamiana, A. thaliana	AT3G07780	Yes	Y2H	https://doi.org/10.1016/j.coviro.2012.09.004
VPg	TuMV	OBE2	N. benthamiana, A. thaliana	AT5G48160	Yes	Y2H	https://doi.org/10.1016/j.coviro.2012.09.004
VPg	PSbMV, LMV, TuMV	OBE3	Pea, N. benthamiana, A. thaliana	AT1G14740	No	Y2H	https://doi.org/10.1016/bs.aivir.2014.11.006
VPg	PSbMV, LMV, TuMV	OBE4	Pea, N. benthamiana, A. thaliana	AT3G63500	No	Y2H	https://doi.org/10.1016/bs.aivir.2014.11.006
VPg	PVA	FIB2	N. benthamiana	AT4G25630	No	Y2H, BiFC	https://doi.org/10.1016/bs.aivir.2014.11.006
VPg	TuMV	SGS3	N. benthamiana	AT5G23570	No	Y2H	https://doi.org/10.1128/JVI.01478-16
VPg	TuMV	eEF1A	A. thaliana	AT3G58470	No	ELISA	https://doi.org/10.1016/bs.aivir.2014.11.006
VPg	PPV	RH8	Peach (Prunus persica), A. thaliana	AT4G00660	No	Y2H	https://doi.org/10.1104/pp.109.147983
VPg	TuMV	ADL6, DRP2A	Glycine max (soybean)	AT1G10290	No	BiFC	https://doi.org/10.1128/JVI.01320-18
VPg	TuMV	ADL3, DRP2B	Glycine max (soybean)	AT1G59610	No	BiFC	https://doi.org/10.1128/JVI.01320-18
VPg	PVA	RPS6	N. benthamiana	AT4G31700	No	Y2H	https://doi.org/10.1094/MPMI-06-16-0122-R
VPg	SCMV	ELC	Sugarcane	n/a	n/a	Y2H	https://doi.org/10.1016/j.bbrc.2015.09.015
VPg	TuMV	DCP2	N. benthamiana	AT5G13570	No	BiFC	https://doi.org/10.1371/journal.ppat.1007228
NIb	ZYMV, TuMV	PAB2	Cucumber, A. thaliana	AT4G34110	No	Y2H	https://doi.org/10.1016/j.coviro.2012.09.004
NIb	ZYMV, TuMV	PAB4	Cucumber, A. thaliana	AT2G23350	No	Y2H	https://doi.org/10.1016/j.coviro.2012.09.004
NIb	ZYMV, TuMV	PAB8	Cucumber, A. thaliana	AT1G49760	No	Y2H	https://doi.org/10.1016/j.coviro.2012.09.004
NIb	TuMV, TEV, SMV	SCE1	A. thaliana	AT3G57870	No	Y2H, BiFC	https://doi.org/10.1016/bs.aivir.2014.11.006
NIb	TuMV	HSP70	A. thaliana	AT3G09440	No	Y2H	https://doi.org/10.1016/j.coviro.2012.09.004
NIb	TuMV	RH9	N. benthamiana	AT3G22310	No	Y2H, BiFC	https://doi.org/10.3390/v12010077
NIb	SMV	eEF1A	Soybean	AT3G58470	No	BiFC, ELISA	https://doi.org/10.3390/v12010077
NIb	TuMV	Beclin1, ATG6	N. benthamiana	AT3G61710	No	BiFC	https://doi.org/10.3390/v12010077
NIb	TuMV	EXLA2	N. benthamiana	AT4G38400	No	Y2H	https://doi.org/10.3390/v12010077
NIb	TuMV	SUMO3	A. thaliana	AT5G55170	No	Y2H	https://doi.org/10.3390/v12010077
NIb	TuMV	EXP1	N. benthamiana	AT1G69530	No	Y2H, BiFC	https://doi.org/10.1111/tpj.13723
NIb	WYMV	bZIP53	N. benthamiana	AT3G62420	No	BiFC	https://doi.org/10.3390/v12010077
CP	PVY	ATJ3	Tobacco	AT3G44110	No	Y2H	https://doi.org/10.1016/j.coviro.2012.09.004
CP	PVY	DJC26	Tobacco	AT4G13830	No	Y2H	https://doi.org/10.1016/j.coviro.2012.09.004
CP	PVY	DJC23	Tobacco	AT4G36040	No	Y2H	https://doi.org/10.1016/j.coviro.2012.09.004
CP	PVY	ATJ2	Tobacco	AT5G22060	No	Y2H	https://doi.org/10.1016/j.coviro.2012.09.004
CP	PVY	RBCL	Tobacco	ATCG00490	No	ELISA	https://doi.org/10.1016/bs.aivir.2014.11.006
CP	TuMV	Chloroplastic 37 kDa protein	Lettuce	n/a	n/a	Y2H, ELISA	https://doi.org/10.1016/bs.aivir.2014.11.006
CP	LMV	Adenine nucleotide alpha hydrolases-like superfamily protein	A. thaliana	AT2G47710	No	Y2H	https://doi.org/10.1007/s00705-017-3292-6
CP	LMV	SRC2	A. thaliana	AT1G09070	No	Y2H	https://doi.org/10.1007/s00705-017-3292-6
CP	LMV	BCAT4	A. thaliana	AT3G19710	No	Y2H	https://doi.org/10.1007/s00705-017-3292-6
CP	LMV	LeuD1	A. thaliana	AT2G43100	No	Y2H	https://doi.org/10.1007/s00705-017-3292-6
CP	LMV, WYMV	ATHSP23.6-MITO	A. thaliana, N. benthamiana	AT4G25200	No	Y2H, BiFC	https://doi.org/10.1007/s00705-017-3292-6, https://doi.org/10.1007/s11262-018-1626-4
CP	LMV	HSP17.6B	A. thaliana	AT2G29500	No	Y2H	https://doi.org/10.1007/s00705-017-3292-6
CP	LMV	HSP17.6II	A. thaliana	AT5G12020	No	Y2H	https://doi.org/10.1007/s00705-017-3292-6
CP	LMV	FBN1b	A. thaliana	AT4G22240	No	Y2H	https://doi.org/10.1007/s00705-017-3292-6
CP	LMV	RNA polymerase II degradation factor-like protein	A. thaliana	AT1G29370	No	Y2H	https://doi.org/10.1007/s00705-017-3292-6
CP	LMV	RTM1	A. thaliana	AT1G05760	No	Y2H	https://doi.org/10.1007/s00705-017-3292-6
CP	LMV	ATTOC159	A. thaliana	AT4G02510	No	Y2H	https://doi.org/10.1007/s00705-017-3292-6
CP	LMV	SAP2	A. thaliana	AT1G03220	No	Y2H	https://doi.org/10.1007/s00705-017-3292-6
CP	LMV	RBCS3B	A. thaliana	AT5G38410	No	Y2H	https://doi.org/10.1007/s00705-017-3292-6
CP	LMV	LRP1	A. thaliana	AT5G12330	No	Y2H	https://doi.org/10.1007/s00705-017-3292-6
CP	LMV	ATPase, F1 complex, alpha subunit protein	A. thaliana	AT2G07698	No	Y2H	https://doi.org/10.1007/s00705-017-3292-6
CP	TuMV	ADL6, DRP2A	Glycine max (soybean)	AT1G10290	No	BiFC	https://doi.org/10.1128/JVI.01320-18
CP	TuMV	ADL3, DRP2B	Glycine max (soybean)	AT1G59610	No	BiFC	https://doi.org/10.1128/JVI.01320-18
CP	PVX	CPIP2a (AAQ82702.1)	N. benthamiana	n/a	n/a	Y2H, BiFC	https://doi.org/10.1038/srep28743
CP	PVX	CPIP2b (AAQ82703.1)	N. benthamiana	n/a	n/a	Y2H, BiFC	https://doi.org/10.1038/srep28743
